# Supplementary material for: Coupled nitrification and N2 gas production as a cryptic process in oxic riverbeds
Source: PubMed Central journal article supplement (PMC7900231; doi:10.1038/s41467-021-21400-3), 2021-02-22
Supplement: 41467_2021_21400_MOESM1_ESM.pdf [file 41467_2021_21400_MOESM1_ESM.pdf]

**Supplementary Information**

**Coupled nitrification and N<sub>2</sub> gas production as a cryptic process in oxic riverbeds**

Ouyang et al.

**Supplementary Note 1 | Derivation of equations.** To derive equations 8 and 9 in the main text in order to define the solution space (Figure 4) where both  $ra$  (by convention the relative contribution from anammox to total  $N_2$  production<sup>1</sup>) and  $F_{N_2}$  fall between  $0 < 1$ .

Let  $D_{28}$ ,  $D_{29}$ , and  $D_{30}$  represent the rates of  $^{28}N_2$ ,  $^{29}N_2$ , and  $^{30}N_2$  production (here in  $nmol\ N\ g^{-1}\ dry\ sediment\ h^{-1}$ ) by denitrification,  $D$ , respectively. From denitrification,  $N_2$  is generated through random isotope pairing. Thus, with  $F_N$  being the fraction of the total porewater nitrite pool labelled with  $^{15}N$  (or the overall  $NO_x^-$  pool,  $NO_2^- + NO_3^-$ ):

$$D_{30} = D \times F_N^2 \quad 1$$

$$D_{29} = D \times 2 \times F_N \times (1 - F_N) \quad 2$$

$$D_{28} = D \times (1 - F_N)^2 \quad 3$$

If denitrification is the only source of  $N_2$ , then the fraction of  $^{15}N$  in the  $N_2$  gas produced is the same as in the porewater nitrite source pool and, combining 1 and 2, is given by:

$$F_{N_2-denitrification} = F_N = \frac{1}{1 + \frac{D_{29}}{2 \times D_{30}}} \quad 4$$

$N_2$  from anammox (e.g.  $nmol\ N\ g^{-1}\ dry\ sediment\ h^{-1}$ ) is generated by a 1:1 pairing between  $N$  from ammonia and nitrite. Thus, if  $A_{28}$ ,  $A_{29}$ , and  $A_{30}$  represent the production of  $^{28}N_2$ ,  $^{29}N_2$ , and  $^{30}N_2$  from anammox,  $A$ , and with  $F_A$  being the fraction of the total porewater ammonia pool labelled with  $^{15}N$ :

$$A_{30} = A \times F_A \times F_N \quad 5$$

$$A_{29} = A \times [F_A \times (1 - F_N) + F_N \times (1 - F_A)] \quad 6$$

$$A_{28} = A \times (1 - F_A) \times (1 - F_N) \quad 7$$

and the degree of  $^{15}N$  labelling in the  $N_2$  produced through anammox is given by:

$$F_{N_2-anammox} = \frac{2 \times A_{30} + A_{29}}{2 \times (A_{30} + A_{29} + A_{28})} \quad 8$$

Inserting equations 5 to 7 in 8 and cancelling out  $A$ :

$$F_{N2-anammox} = 0.5 \times (F_A + F_N) \quad 9$$

Let  $ra$  represent the relative contribution of anammox to  $N_2$  production:

$$ra = \frac{A}{A+D} \quad 10$$

then:

$$F_{N2} = ra \times F_{N2-anammox} + (1 - ra) \times F_{N2-denitrification} \quad 11$$

and inserting 4 and 9 in 11:

$$F_{N2} = ra \times 0.5 \times (F_A + F_N) + (1 - ra) \times F_N = ra \times 0.5 \times (F_A - F_N) + F_N \quad 12$$

With both  $F_{N2}$  and  $ra$  unknown, this cannot be solved. Instead, as shown in<sup>2</sup> we can determine  $ra$  from the ratio,  $R$ , of  $^{29}N_2$  and  $^{30}N_2$  production:

$$ra = \frac{(R + 2) \times F_N^2 - 2 \times F_N}{(F_N - F_A) \times [(R + 2) \times F_N - 1]} \quad 13$$

and inserting in 12 we derive  $F_{N2}$  solely from  $F_N$  and  $R$ :

$$F_{N2} = F_N - \frac{R \times F_N + 2 \times (F_N - 1)}{2 \times (R + 2 - \frac{1}{F_N})} \quad 14$$

Note that  $F_A$  is no longer required.



**Supplementary Figure 2.** Example of an oxic incubation with  $^{15}\text{NH}_4^+$  both with and without ATU (allylthiourea) for a gravel-dominated sediment from the River Darent. **a**, Production of  $^{15}\text{N-N}_2$  ( $\circ$  -ATU,  $\nabla$  + ATU) and dissolved oxygen concentrations throughout the incubation ( $\blacksquare$ ) and **b**, parallel production of  $^{15}\text{N-NO}_3^-$  (same symbols as **a**). Data are mean values  $\pm$  standard error ( $n = 5$ ) and the maintenance of oxic conditions throughout agrees with what we reported previously<sup>3</sup>.

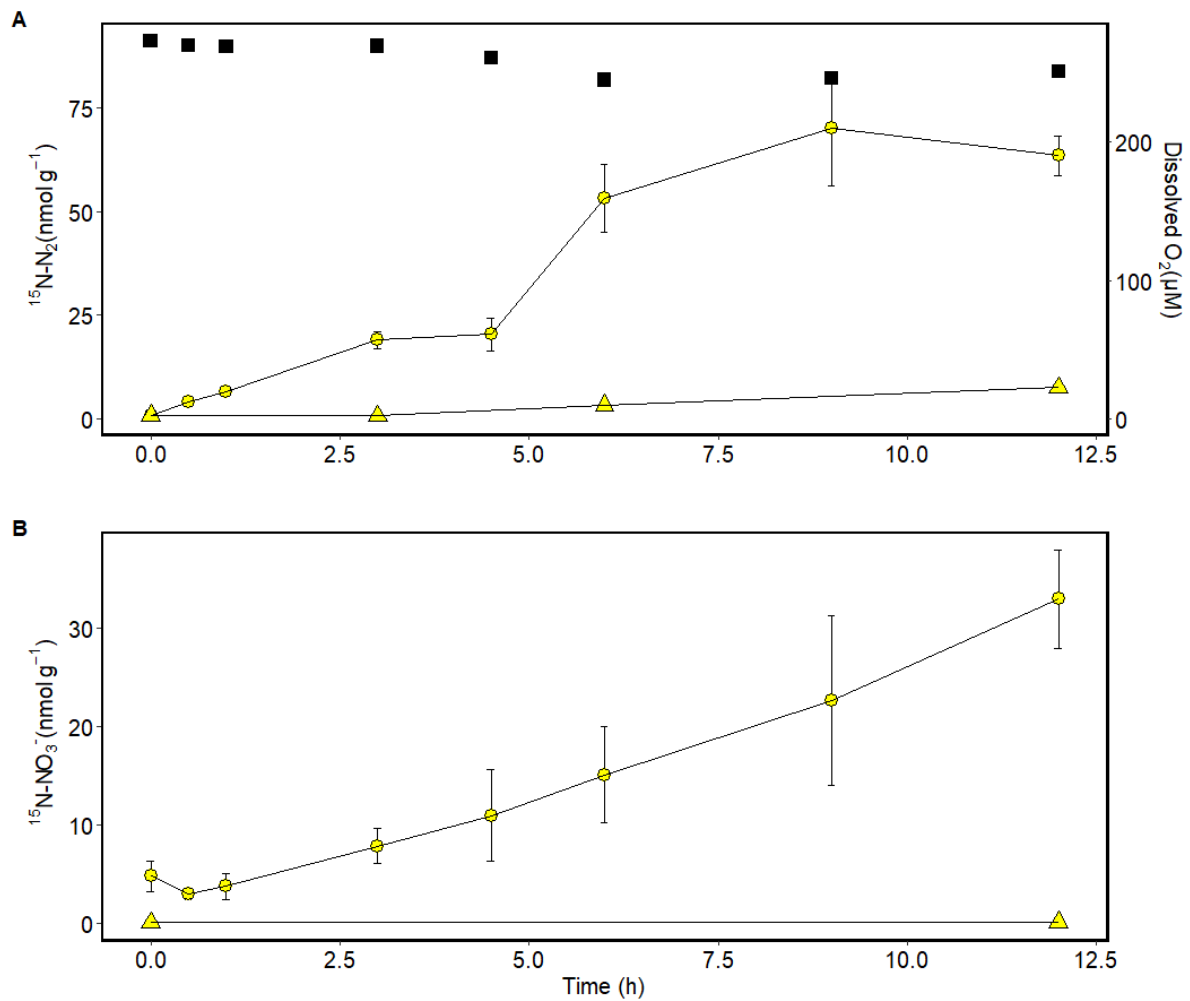

**Supplementary Figure 3.** In a typical  $^{15}\text{N}$  isotope pairing experiment  $^{15}\text{N}$ -labelled nitrite or nitrate could be added at purities from 5% to 99.2% ( $^{15}\text{N}$  atom %) to give a range of  $F_N$  where  $F_N = ^{15}\text{N}$  atom % / 100. If the resulting  $^{15}\text{N}$ -labelled  $\text{N}_2$  gases were simply produced by denitrification, then the ratio between  $^{29}\text{N}_2$  and  $^{30}\text{N}_2$  ( $R$ ) would increase as an inverse function of  $^{15}\text{N}$  (atom %). **a**, Original, linear data and **b**, after  $\log_{10}$  transformation as for the  $x$ -axis in Figure 4 in the main text.

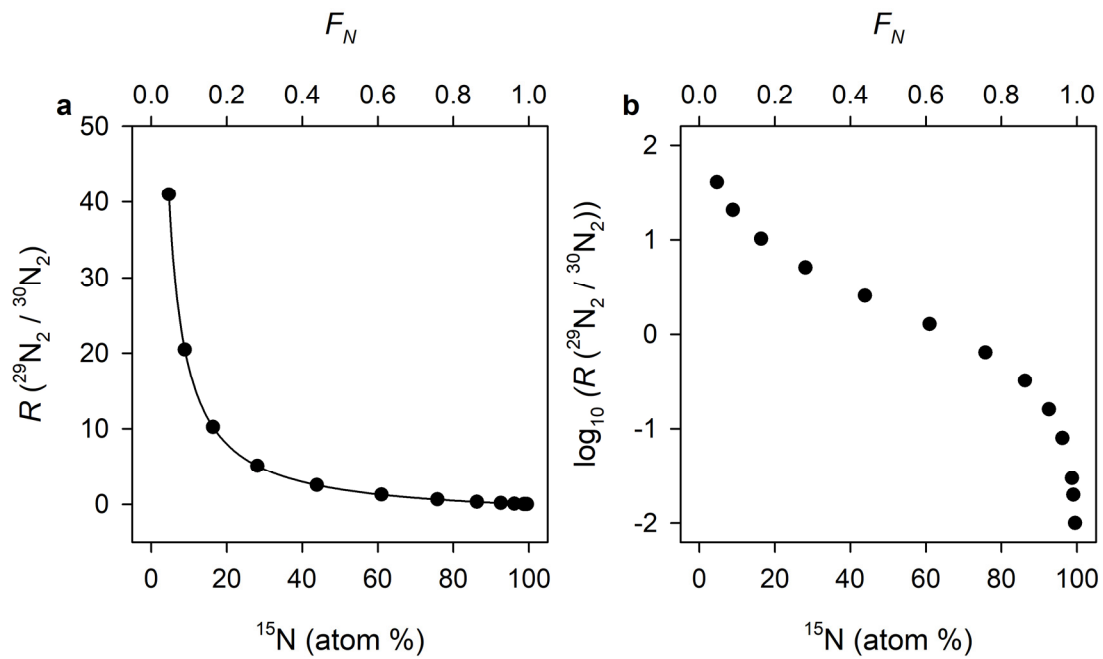

**Supplementary Figure 4.** Solution spaces for low (0.1) and high (0.9) values for  $F_A$  and combinations of equations 8 and 9 where both  $F_{N2}$  and  $ra$  fall between  $>0<1$ . Note the shift in the position of the gap, where  $F_A=F_N$ , from  $R$  of between  $\sim 1.0$  and  $1.5$ , to  $R$  of between  $\sim -0.6$  to  $-0.7$  for the low and high values of  $F_A$ , respectively.

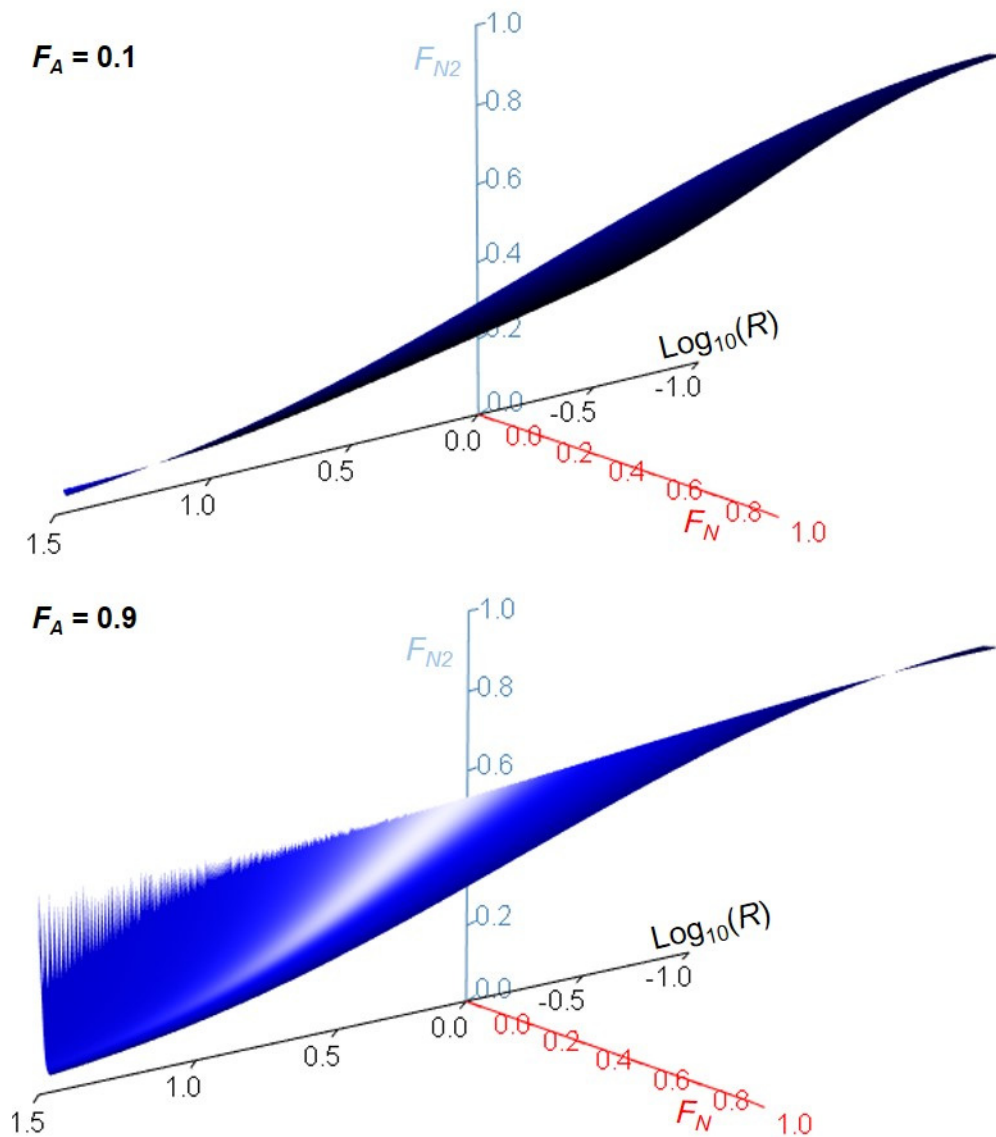

**Supplementary Table 1.** Site locations for the 12 rivers sampled and their sediment characteristics in rank order of gravel content (%).

| River                   | Latitude | Longitude | Grainsize (%) <sup>a</sup> |      |     | Organic C<br>( $\mu\text{mol g}^{-1}$ ) <sup>b</sup> | N<br>( $\mu\text{mol g}^{-1}$ ) <sup>b</sup> | C: N<br>(molar ratio) <sup>b</sup> |
|-------------------------|----------|-----------|----------------------------|------|-----|------------------------------------------------------|----------------------------------------------|------------------------------------|
|                         |          |           | gravel                     | sand | mud |                                                      |                                              |                                    |
| Pant                    | 52.0044  | 0.316916  | 84.4                       | 15   | 0.6 | 155±6                                                | 22±0.8                                       | 7±0                                |
| Broadstone <sup>d</sup> | 51.08326 | 0.05549   | 82.2                       | 15.9 | 1.9 | 255±46                                               | 17±1.8                                       | 15±1.1                             |
| Wylfe                   | 51.14248 | -2.20331  | 74.5                       | 23.6 | 1.9 | 555±26                                               | 49±10.7                                      | 12±1.9                             |
| Rib                     | 51.83917 | -0.02936  | 67.7                       | 31.6 | 0.7 | 282±23                                               | 35±3.1                                       | 8±0.1                              |
| Lambourn*               | 51.44089 | -1.38661  | 66.1                       | 32.9 | 1   | 222±23                                               | 21±0.4                                       | 11±1                               |
| Darent*                 | 51.35043 | 0.188336  | 53.1                       | 44   | 2.8 | 801±59                                               | 61±6.3                                       | 13±0.4                             |
| Marden*                 | 51.31829 | -1.86     | 39.2                       | 59.7 | 1   | 293±23                                               | 32±3                                         | 9±0.2                              |
| Stour (1) <sup>c</sup>  | 51.15604 | 0.828219  | 26.0                       | 73   | 1   | 151±16                                               | 13±1.3                                       | 11±0.1                             |
| Stour (2) <sup>c</sup>  | 51.22574 | 0.957806  | 16.4                       | 82.5 | 1.1 | 96±10                                                | 7±0.7                                        | 13±0.6                             |
| Nadder                  | 51.04385 | -2.11182  | 9.9                        | 87.4 | 2.7 | 287±114                                              | 15±6.5                                       | 22±4.3                             |
| Hammer*                 | 51.14607 | 0.610196  | 0.0                        | 98.9 | 1.1 | 66±2                                                 | 6±0.4                                        | 12±1.1                             |
| Medway                  | 51.26798 | 0.518439  | 0.0                        | 97.4 | 2.6 | 244±79                                               | 14±2.4                                       | 17±2.6                             |

\*The first four rivers chosen for sediment collection.

<sup>a</sup> Data are mean values ( $n=3$ ).

<sup>b</sup> Organic C, N and C: N data are mean values  $\pm$  1 standard error ( $n = 3$ ).

<sup>c</sup> The rivers Stour (1) and Stour (2) are on the chalk, with predominantly gravel-dominated riverbeds but the sediments collected from sand dominated stretches.

<sup>d</sup> The River Broadstone is an acidic river on a sand-based geology.



**Supplementary Table 2.** Contrast tables for the effects of both ATU (all 12 rivers) and addition of  $^{14}\text{NO}_2^-$  (first 4 rivers) on the rates of both  $^{29}\text{N}_2$  and  $^{30}\text{N}_2$  production during the first 10h of oxic incubations with  $^{15}\text{N-NH}_4^+$ . Mixed-effects models were fitted using the lme4 package in R<sup>4</sup> and contrasts, parameter (marginal mean) estimates and standard errors derived using emtrends with Kenwood-Roger degrees of freedom and Tukey correction where appropriate.

**a, production of  $^{29}\text{N}_2$  over time**

| Treatment<br>(code)                                   | Obs.<br>(Rivers) | Parameter $^{29}\text{N}_2$<br>(nmol g <sup>-1</sup> h <sup>-1</sup> ) | Contrast | Estimate<br>(s.e.) | <i>t</i> | <i>P</i> |
|-------------------------------------------------------|------------------|------------------------------------------------------------------------|----------|--------------------|----------|----------|
| $^{15}\text{NH}_4^+$ (2)                              | 400 (4)          | 0.9997                                                                 |          |                    |          |          |
| $^{15}\text{NH}_4^+$ + ATU (1)                        | 400 (4)          | 0.0875                                                                 | 1 - 2    | -0.9122 (0.1469)   | 6.211    | <0.001   |
| $^{15}\text{NH}_4^+$ + $^{14}\text{NO}_2^-$ (4)       | 400 (4)          | 1.1392                                                                 | 4 - 2    | 0.1395 (0.0966)    | 1.445    | 0.473    |
| $^{15}\text{NH}_4^+$ + $^{14}\text{NO}_2^-$ + ATU (3) | 400 (4)          | 0.0910                                                                 | 4 - 3    | -1.0482 (0.1469)   | 7.137    | <0.001   |
| $^{15}\text{NH}_4^+$ (2)                              | 760 (12)         | 0.742                                                                  |          |                    |          |          |
| $^{15}\text{NH}_4^+$ + ATU (1)                        | 760 (12)         | 0.139                                                                  | 1 - 2    | -0.603 (0.051)     | 11.882   | <0.001   |

**b, production of  $^{30}\text{N}_2$  over time**

| Treatment<br>(code)                                   | Obs.<br>(Rivers) | Parameter $^{30}\text{N}_2$<br>(nmol g <sup>-1</sup> h <sup>-1</sup> ) | Contrast | Estimate<br>(s.e.) | <i>t</i> | <i>P</i> |
|-------------------------------------------------------|------------------|------------------------------------------------------------------------|----------|--------------------|----------|----------|
| $^{15}\text{NH}_4^+$ (2)                              | 400 (4)          | 0.5792                                                                 |          |                    |          |          |
| $^{15}\text{NH}_4^+$ + ATU (1)                        | 400 (4)          | 0.0026                                                                 | 1 - 2    | -0.5766 (0.0810)   | 7.117    | <0.001   |
| $^{15}\text{NH}_4^+$ + $^{14}\text{NO}_2^-$ (4)       | 400 (4)          | 0.5386                                                                 | 4 - 2    | 0.0406 (0.0533)    | 0.761    | 0.872    |
| $^{15}\text{NH}_4^+$ + $^{14}\text{NO}_2^-$ + ATU (3) | 400 (4)          | -0.0133                                                                | 4 - 3    | -0.5518 (0.0810)   | 6.812    | <0.001   |
| $^{15}\text{NH}_4^+$ (2)                              | 760 (12)         | 0.4649                                                                 |          |                    |          |          |
| $^{15}\text{NH}_4^+$ + ATU (1)                        | 760 (12)         | 0.0484                                                                 | 1 - 2    | -0.416 (0.029)     | 14.382   | <0.001   |

**Supplementary Table 3. a,** Overall mean values, confidence intervals and median values for the fraction of  $^{15}\text{N}$  labelling in the porewater  $\text{NO}_2^-$  and  $\text{NO}_x^-$  pools ( $F_N$ ) and ammonia pool ( $F_A$ ) for treatments 2 and 4 in the first 4 set of rivers and just treatment 2 in the second set of 12 rivers. **b,** Overall predicted  $R$  values as for Table 2 in the main text but for  $F_N$  as either  $\text{NO}_2^-$  or  $\text{NO}_x^-$  where appropriate. Mixed-effects models were fitted using “lme4” in R<sup>4</sup> and 95% confidence intervals derived using the emmeans package. Medians values were simply calculated using all observations in each treatment. Note that to estimate the means in both **a,** and **b,** incubation time was fitted as a random effect for the first set of 4 rivers but as a fixed effect for the 12 rivers.

**a,**

| Code,<br>Treatment                                  | Rivers | $F_N \text{NO}_2^-$ |             |        | $F_N \text{NO}_x^-$ |             |        | $F_A$ |             |        |
|-----------------------------------------------------|--------|---------------------|-------------|--------|---------------------|-------------|--------|-------|-------------|--------|
|                                                     |        | Mean                | 95% CI      | Median | Mean                | 95% CI      | Median | Mean  | 95% CI      | Median |
| <b>2,</b> $^{15}\text{NH}_4^+$                      | 4      | 0.323               | 0.270-0.377 | 0.278  | 0.415               | 0.362-0.468 | 0.328  | 0.571 | 0.518-0.624 | 0.613  |
| <b>4,</b> $^{15}\text{NH}_4^+ + ^{14}\text{NO}_2^-$ | 4      | 0.267               | 0.214-0.320 | 0.138  | 0.358               | 0.305-0.411 | 0.208  | 0.515 | 0.462-0.568 | 0.637  |
| <b>2,</b> $^{15}\text{NH}_4^+$                      | 12     | 0.160               | 0.128-0.192 | 0.111  | 0.250               | 0.218-0.282 | 0.187  | 0.448 | 0.416-0.480 | 0.469  |

**b,**

| Code,<br>Treatment                                  | Rivers<br>(replicates) | Process         | $F_N$           | $R$<br>( $^{29}\text{N}_2 / ^{30}\text{N}_2$ ) | Lower       | Upper       |
|-----------------------------------------------------|------------------------|-----------------|-----------------|------------------------------------------------|-------------|-------------|
|                                                     |                        |                 |                 |                                                | 95%<br>C.I. | 95%<br>C.I. |
| <i>Predicted</i>                                    |                        |                 |                 |                                                |             |             |
| <b>2,</b> $^{15}\text{NH}_4^+$                      | 4 (5)                  | Denitrification | $\text{NO}_2^-$ | 7.81 (1.36)                                    | 5.1         | 10.5        |
| <b>2,</b> $^{15}\text{NH}_4^+$                      | 4 (5)                  |                 | $\text{NO}_x^-$ | 7.78 (1.36)                                    | 5.1         | 10.5        |
| <b>4,</b> $^{15}\text{NH}_4^+ + ^{14}\text{NO}_2^-$ | 4 (5)                  |                 | $\text{NO}_2^-$ | 19.60 (1.35)                                   | 16.9        | 22.3        |
| <b>4,</b> $^{15}\text{NH}_4^+ + ^{14}\text{NO}_2^-$ | 4 (5)                  |                 | $\text{NO}_x^-$ | 19.54 (1.35)                                   | 16.9        | 22.2        |
| <b>2,</b> $^{15}\text{NH}_4^+$                      | 12 (5)                 | Denitrification | $\text{NO}_2^-$ | 29.4 (2.28)                                    | 24.8        | 33.9        |
| <b>2,</b> $^{15}\text{NH}_4^+$                      | 12 (5)                 | Denitrification | $\text{NO}_x^-$ | 22.2 (2.28)                                    | 17.6        | 26.7        |
| <b>2,</b> $^{15}\text{NH}_4^+$                      | 12 (5)                 | Anammox         | $\text{NO}_2^-$ | 19.3 (2.28)                                    | 14.8        | 23.9        |
| <b>2,</b> $^{15}\text{NH}_4^+$                      | 12 (5)                 | Cryptic         | $\text{NO}_2^-$ | 9.3 (2.28)                                     | 4.76        | 13.8        |

## Supplementary References

- 1 Risgaard-Petersen, N., Nielsen, L. P., Rysgaard, S., Dalsgaard, T. & Meyer, R. L. Application of the isotope pairing technique in sediments where anammox and denitrification coexist. *Limnol. Oceanogr. Methods* **1**, 63 - 73 (2003).
- 2 Song, G. D., Liu, S. M., Kuypers, M. M. M. & Lavik, G. Application of the isotope pairing technique in sediments where anammox, denitrification, and dissimilatory nitrate reduction to ammonium coexist. *Limnol. Oceanogr. Meth.* **14**, 801-815 (2016).
- 3 Lansdown, K. *et al.* Importance and controls of anaerobic ammonium oxidation influenced by riverbed geology. *Nature Geosci* **9**, 357-360 (2016).
- 4 R Development Core Team. R: A language and environment for statistical computing. (R Foundation for Statistical Computing, Vienna, Austria., 2014).
