# Supplementary material for: Coupled nitrification and N2 gas production as a cryptic process in oxic riverbeds
Source: PubMed Central journal article supplement (PMC7900231; doi:10.1038/s41467-021-21400-3), 2021-02-22
Supplement: 41467_2021_21400_MOESM4_ESM.pdf [file 41467_2021_21400_MOESM4_ESM.pdf]

## **Description of Additional Supplementary Files**

### **Title: Supplementary Data 1**

Description: All original and processed data. Supporting data for the 4 river study and 12 river study, each provided on two separate tabs each as either original data or after truncating and processing as described in the "Data description" tab.
